# Supplementary material
Source: Springer Nature journal article supplement (https://www.springermedizin.de/resource/supplementary/13256_2007_450_MOESM4_ESM.pdf/9646008)

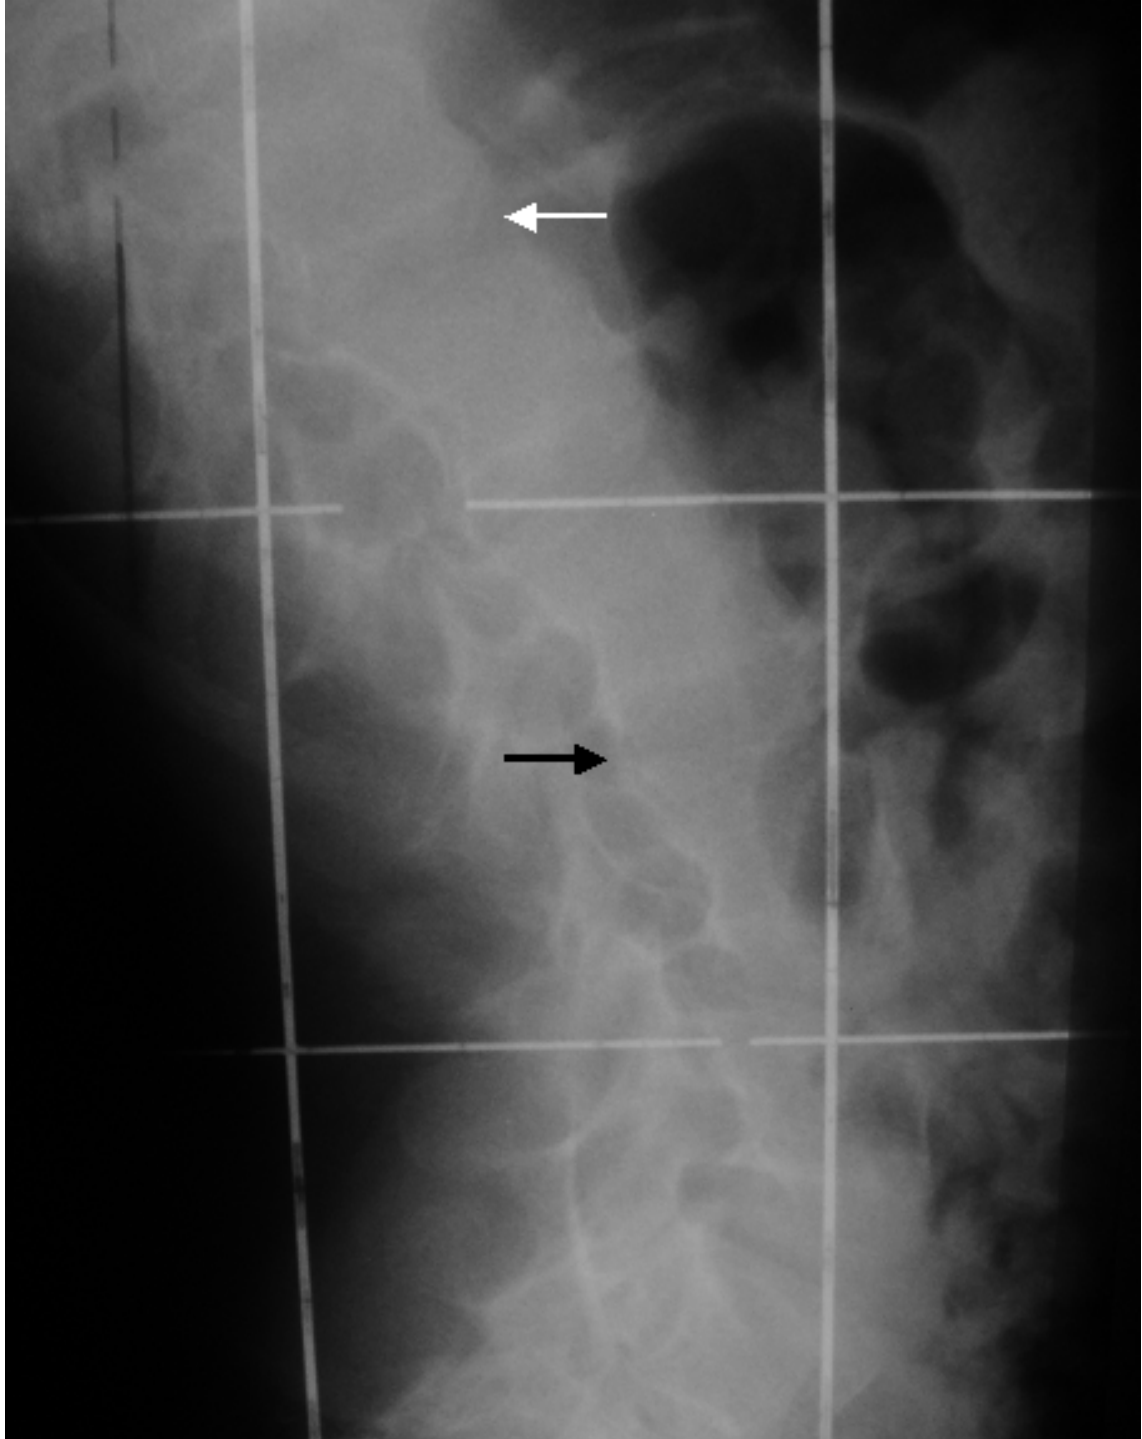

Supplement: MOESM4 [file 9646008]
